# Supplementary material for: Assessing the impact of corporate entrepreneurship in the financial performance of subsidiaries of Colombian business groups: under environmental dynamism moderation
Source: Research Square preprint supplement (doi:10.21203/rs.3.rs-96202/v2), 2021-02-01
Supplement: Supplementary file 1 [file 728ac9bef8ed61a7c5fea9c4.xlsx]

## Sheet: FINAL DATASET 2 05 2019
DATOS DEFINITIVOS UTILIZADOS EN SMARTPLS
ED	ED	ED	ED	ED	IN1a	IN1b	IN2a	IN2b	PR1a	PR1b	PR1c	PR2a	RT1	RT2	RT3	AU1	AU2	AU3	AU4	AU5	AU6	AU7	AG1	AG2	AG3	BC1	BC2	BC3	BC4	BC5	BC6	PI1	PI2	PI3	PI4	PI5	TE1	TE2	TE3	TE4	TE5	EG1	EG2	EG3	EG4	EG5	ROEN	RGN
5	6	6	4	6	3	3	4	2	4	2	2	4	2	2	2	3	5	4	6	4	4	3	5	5	4	1	4	1	1	5	5	6	5	6	1	7	4	4	4	4	5	4	5	2	6	4	-0.094385	0.710112
5	5	3	3	5	4	3	5	4	3	2	3	3	3	3	2	5	5	5	6	5	3	3	5	4	6	4	5	5	5	3	5	5	5	5	4	5	2	2	2	2	2	2	7	2	7	6	0.888854	-0.479609
4	4	4	4	5	5	4	4	3	4	4	4	4	4	4	4	4	4	5	4	4	4	3	4	4	4	4	4	5	3	4	4	5	4	4	3	4	3	3	3	3	4	3	3	3	4	4	-0.963701	1.60089
3	3	5	4	5	3	3	3	3	3	3	3	3	3	3	2	5	3	5	2	2	2	3	3	3	3	2	5	3	3	5	5	4	3	3	1	2	1	2	4	1	1	1	3	3	5	1	0.853535	0.225817
7	7	7	6	6	5	4	2	3	7	3	2	7	2	2	3	3	3	5	4	5	7	4	4	2	3	3	5	3	1	1	2	1	2	5	6	3	7	6	3	6	5	4	4	3	4	3	0.196902	0.908437
3	6	2	5	3	6	4	4	2	5	4	4	5	3	4	5	6	5	6	3	4	5	3	5	5	2	2	2	3	5	7	4	6	4	5	5	3	5	3	2	3	5	5	6	2	5	5	-0.737915	-0.300123
2	2	2	4	2	3	3	2	2	3	5	5	6	4	4	6	5	5	4	6	3	3	2	4	5	6	4	4	2	2	4	2	4	3	3	3	3	2	2	1	1	2	3	5	4	6	4	0.294259	0.566419
2	6	6	7	6	2	2	2	1	6	2	2	6	2	1	5	3	4	2	5	2	3	3	2	5	5	2	3	4	2	3	3	3	4	6	1	4	2	2	1	2	3	2	5	3	5	1	-2.69749	-2.63727
5	4	3	3	2	4	4	4	3	5	5	5	4	4	4	5	7	6	6	5	4	4	3	4	4	4	5	5	5	4	6	4	6	5	5	2	4	5	5	3	4	6	4	5	3	6	5	-0.399282	1.76426
4	1	5	5	1	6	6	6	4	6	6	6	6	5	6	6	6	6	7	6	6	6	4	5	5	4	6	6	5	4	6	6	6	6	6	4	5	5	5	5	5	5	6	6	6	5	4	-0.328729	-0.389066
7	5	5	4	5	7	7	7	7	5	5	5	6	5	5	6	5	5	5	6	6	5	4	6	6	6	6	6	7	7	7	7	7	7	5	4	5	1	4	1	4	4	7	7	7	4	4	0.0055345	-0.419766
6	3	4	2	2	6	6	4	2	2	3	2	7	7	5	7	5	4	5	7	7	7	1	7	5	7	6	4	7	7	7	3	7	7	5	5	5	5	4	4	5	7	6	6	7	7	6	-2.20842	0.265591
3	2	2	3	5	4	5	5	4	4	5	5	3	5	4	3	5	4	5	4	3	3	2	5	5	5	4	4	4	3	5	3	6	5	6	6	5	7	6	6	2	5	5	5	1	6	4	-0.407798	-0.373255
5	2	2	6	3	6	4	5	3	7	6	5	6	1	1	1	3	2	2	5	5	4	4	5	4	4	4	4	5	4	6	2	7	1	3	2	1	6	1	1	1	3	5	6	1	6	6	0.160581	0.410927
5	2	2	6	3	6	4	5	3	7	6	5	6	1	1	1	3	2	2	5	5	4	4	5	4	4	4	4	5	4	6	2	7	1	3	2	1	6	1	1	1	3	5	6	1	6	6	-0.933564	0.440137
5	4	4	4	5	4	4	4	5	4	4	4	4	4	4	4	4	4	4	4	3	4	4	4	4	4	4	4	4	3	3	4	5	4	4	4	5	4	3	4	4	4	4	4	4	4	4	1.83458	0.446536
4	4	5	4	4	1	1	3	4	5	3	7	2	5	3	6	5	4	5	5	3	5	3	5	5	3	5	4	3	6	2	5	4	7	6	4	7	5	5	6	4	4	5	3	5	3	5	-0.0301844	-0.378889
6	6	3	3	6	3	3	5	6	3	3	3	2	6	6	2	2	3	2	2	2	3	2	2	4	7	5	5	7	1	1	6	5	6	5	5	3	1	1	7	7	2	3	1	1	6	2	-0.810879	-1.1899
3	4	2	3	3	7	5	6	4	5	7	6	7	6	6	6	7	6	7	7	6	4	3	6	4	7	5	7	7	4	6	7	6	6	6	6	5	4	3	5	5	5	3	7	4	5	7	0.191051	0.581061
5	5	4	4	5	6	6	6	5	6	6	6	6	5	5	5	6	5	5	6	6	5	3	6	5	6	6	5	6	4	6	5	6	5	5	5	5	5	5	5	4	5	4	5	4	6	5	-1.92073	-0.707107
5	5	6	5	7	7	7	7	5	7	7	7	7	6	6	4	4	4	7	7	6	5	4	6	4	5	7	7	7	6	7	7	6	6	6	4	6	7	7	6	5	5	6	6	6	5	6	1.08289	0.301229
3	4	2	5	6	4	5	5	4	4	5	5	6	2	2	2	6	6	7	7	6	6	3	5	3	4	3	4	4	3	4	4	4	5	3	3	4	4	4	2	2	4	2	1	1	5	1	1.13036	-0.542198
3	1	2	2	3	5	4	5	4	6	6	4	5	3	4	4	5	5	6	6	5	5	4	6	5	5	4	6	6	4	6	6	5	5	5	2	5	5	5	2	3	5	2	4	3	3	3	0.488423	0.506104
3	2	4	3	4	6	6	7	3	4	5	5	5	4	4	4	4	3	2	7	1	1	3	7	5	4	7	7	7	7	7	7	6	6	6	4	5	2	2	2	2	2	7	3	7	5	4	0.244525	0.347795
5	3	3	3	4	5	4	5	4	5	6	6	6	5	4	5	5	5	5	5	4	5	2	6	5	6	6	6	6	5	6	6	5	6	6	3	6	5	5	5	4	5	3	6	5	4	4	0.512631	-0.0278124
6	2	5	6	2	6	4	5	2	5	6	6	6	3	2	5	5	5	6	6	6	6	6	6	6	5	4	5	6	5	6	5	6	5	7	7	6	6	5	4	5	6	6	6	6	6	6	-0.471585	-0.127512
3	1	1	1	2	2	3	2	2	4	4	3	4	3	2	2	3	3	3	4	3	4	4	4	5	5	4	4	5	3	4	3	5	2	4	3	3	4	3	2	4	2	3	4	2	3	2	-0.296676	-0.717659
3	3	3	4	5	2	5	3	2	5	4	3	2	4	4	4	5	4	5	5	4	4	3	2	3	3	3	3	4	2	3	3	3	3	3	3	3	3	3	3	5	4	2	2	3	7	3	1.09768	-0.585409
4	1	5	3	5	6	6	2	2	2	3	3	3	5	3	3	7	7	6	7	6	5	5	3	2	6	2	2	7	7	7	2	4	4	4	1	1	1	1	1	1	1	1	5	4	1	1	2.52601	1.32202
1	1	2	1	1	1	1	4	4	7	7	7	7	4	1	1	2	4	4	5	3	3	1	2	3	2	1	1	2	1	4	5	4	4	4	2	2	2	3	4	3	3	1	2	1	7	2	1.09905	0.273313
4	4	5	5	3	6	6	5	5	6	5	6	6	6	4	5	5	5	5	5	5	6	4	5	5	5	5	5	6	5	5	6	5	5	6	5	5	6	5	5	5	6	5	5	5	6	6	0.76191	0.0893811
5	1	3	1	2	4	4	2	3	4	4	4	5	5	6	4	6	4	5	7	7	6	4	5	5	6	5	4	5	5	5	4	4	4	5	4	4	4	3	4	3	3	3	5	3	5	4	0.87084	0.172796
3	3	3	1	4	5	4	5	4	6	5	4	3	6	3	6	6	4	3	7	7	7	2	5	5	6	6	6	4	3	6	3	5	6	6	5	6	3	4	4	1	3	3	6	3	4	4	-0.2067	-0.365687
7	7	6	5	7	4	3	3	6	6	5	6	6	6	6	5	6	4	6	5	4	4	4	5	2	6	6	6	6	6	6	6	6	6	7	6	6	7	4	6	3	6	6	6	4	5	5	-0.670336	-0.0686473
4	4	2	6	4	2	1	2	1	5	4	6	5	4	3	4	6	5	5	7	6	7	3	6	5	5	5	4	4	4	6	4	4	3	4	4	3	2	2	3	2	3	4	5	4	5	5	1.42543	1.04679
5	3	3	3	6	6	5	5	4	4	5	6	5	5	4	3	5	5	5	6	5	4	1	5	3	4	6	6	6	6	6	6	6	6	6	3	6	4	3	3	2	3	3	6	5	5	3	1.11509	0.54646
5	4	4	3	7	7	6	5	5	6	5	6	6	5	4	3	6	6	6	7	5	5	2	5	4	5	7	7	7	7	7	7	7	7	7	3	6	5	4	4	4	5	5	7	6	6	4	-0.0605194	0.946389
6	3	4	2	4	6	7	6	5	6	6	5	6	5	4	5	6	5	6	6	5	6	6	6	3	4	4	4	5	4	6	6	6	6	6	5	5	3	5	5	4	2	3	6	3	6	6	-0.447817	0.149868
7	4	3	5	6	6	7	7	5	6	6	6	7	3	5	5	6	6	6	6	5	5	3	5	5	5	2	2	3	6	5	5	3	5	6	6	6	7	6	6	1	5	6	6	6	6	6	0.0702232	-0.352645
3	1	4	5	5	7	7	7	6	7	7	5	7	7	5	7	7	5	7	7	7	7	3	6	4	4	4	5	7	7	7	4	7	5	7	7	7	7	6	6	1	6	7	7	7	7	7	-1.64579	-0.198761
5	2	3	5	5	6	7	7	5	6	6	5	7	5	5	6	6	5	6	6	6	6	3	5	4	4	3	3	5	6	6	4	5	5	6	6	6	7	6	6	1	5	6	6	6	6	6	0.0106819	0.613819
5	2	5	3	3	6	4	5	5	3	3	3	3	2	2	3	4	4	5	5	4	2	3	4	2	3	4	5	3	2	5	4	5	5	5	5	5	4	4	4	3	4	4	3	3	5	5	-2.73653	0.974718
5	4	5	5	3	3	3	3	2	3	3	2	3	4	3	4	5	4	5	6	4	4	3	5	4	5	6	2	4	3	4	3	3	3	3	3	4	2	1	1	3	2	1	3	2	5	1	-1.50711	-0.352068
6	2	2	4	3	3	2	2	4	4	4	2	4	3	3	2	2	2	3	4	4	3	4	4	4	3	4	5	6	2	4	2	2	3	4	4	3	4	4	4	4	4	1	5	4	5	5	0.379003	-0.107719
4	2	4	4	4	5	5	3	3	6	5	5	6	7	6	6	5	5	7	7	5	6	3	6	6	7	4	5	6	4	6	6	4	4	2	2	4	1	1	2	1	2	2	1	2	3	3	0.74352	-0.543301
3	2	2	2	6	2	1	2	2	3	1	4	3	2	4	3	5	6	6	7	7	5	6	6	4	2	1	3	5	5	5	3	2	3	1	1	2	4	2	2	1	1	1	1	1	7	1	-0.0222997	2.1595
3	2	3	4	2	7	5	7	6	6	5	5	5	5	3	5	6	4	3	6	4	5	2	4	2	6	4	6	6	5	7	7	7	7	7	6	7	6	6	3	4	3	5	7	3	7	6	1.12662	0.191437
1	1	3	2	3	3	2	3	2	5	5	5	5	3	4	3	5	5	5	5	5	4	3	4	4	4	3	4	5	3	4	4	4	3	4	3	3	3	3	2	2	2	2	2	2	4	2	0.0559311	-0.162698
2	5	2	3	2	2	2	2	3	5	4	2	5	5	5	5	6	5	7	7	6	6	2	6	5	5	6	7	7	4	6	5	4	6	4	3	5	4	4	2	3	4	2	2	5	5	2	-0.521905	0.0415226
4	5	4	3	6	5	6	5	4	5	6	5	7	5	4	5	5	6	5	6	5	5	3	6	4	5	6	5	5	3	6	6	6	6	6	3	5	6	6	6	3	5	4	6	6	6	4	0.582088	-1.159
4	2	1	2	3	4	3	3	4	6	6	5	7	4	3	5	6	6	5	6	5	6	5	6	5	6	5	5	4	4	5	5	5	4	5	4	4	4	5	5	4	5	2	3	4	6	4	0.0214453	2.79228
4	3	4	4	3	4	4	4	3	4	4	3	4	2	3	3	5	5	5	6	5	5	3	4	3	3	2	3	3	3	3	3	4	3	5	5	4	5	4	4	2	2	3	5	5	4	4	2.98131	-2.82793
7	1	3	1	4	5	5	4	2	6	6	5	6	4	5	4	5	4	4	5	4	6	4	4	5	5	1	3	2	5	5	5	6	4	5	6	6	7	6	5	1	3	4	2	2	6	3	0.528711	-1.2294
4	5	4	3	3	5	4	3	4	5	4	4	5	3	3	3	4	4	4	4	4	5	5	4	4	4	5	4	3	4	4	4	5	4	3	3	3	4	3	3	5	5	5	4	3	4	4	2.66664	0.669074
5	2	3	3	3	4	3	4	4	4	4	4	5	4	4	3	4	4	4	5	4	4	3	4	2	2	2	3	2	2	4	4	5	3	5	5	4	5	5	5	2	4	5	4	3	5	5	0.286917	0.743711
6	6	4	5	6	6	5	5	4	6	6	5	6	5	5	5	6	6	5	5	4	5	4	4	2	3	2	2	4	1	2	3	3	3	5	5	5	6	5	5	4	5	6	6	5	6	6	-0.123594	-0.707107
3	1	1	3	3	2	5	4	3	2	2	1	1	2	1	1	7	5	5	2	1	2	1	1	4	2	7	1	1	1	4	4	5	2	2	2	2	2	3	7	7	2	1	1	1	5	3	1.09792	0.478616
3	2	6	2	3	2	2	2	2	3	4	2	5	3	3	4	5	4	3	2	2	5	3	3	1	2	1	1	2	3	5	3	6	2	5	5	7	7	6	7	4	1	6	6	5	6	5	-1.23164	-0.217712
6	7	5	6	6	4	5	7	5	6	6	6	6	4	5	5	5	5	5	1	1	5	1	2	1	1	3	3	3	7	7	5	7	6	7	6	6	7	7	6	1	4	4	6	6	6	3	0.738894	-0.250921
7	4	4	4	4	7	6	6	5	6	5	6	7	7	7	4	5	5	5	4	5	5	5	6	6	5	7	7	7	6	6	7	6	7	7	2	6	5	4	5	5	6	7	6	5	4	4	0.349747	-0.0985734
7	3	5	5	3	3	3	5	3	2	2	7	5	6	4	5	6	6	6	3	3	5	2	2	3	3	1	1	1	1	1	1	1	1	4	4	2	7	5	5	5	6	6	6	6	7	6	-0.659571	1.74871
5	4	3	2	5	5	5	6	5	5	6	5	5	4	4	4	3	4	2	5	4	4	3	7	6	5	5	5	6	3	6	5	5	4	5	3	3	6	4	4	2	5	6	6	4	6	5	0.20835	-0.113929
4	1	7	7	1	7	6	7	6	4	4	7	6	6	6	6	7	7	7	7	7	7	7	7	4	4	6	4	4	7	5	6	5	7	6	7	4	7	5	6	1	7	7	7	6	7	7	-0.0611577	1.40437
4	6	3	5	4	6	5	6	2	3	2	3	3	2	2	3	6	5	5	5	5	5	2	5	3	4	3	3	5	5	4	5	5	5	6	4	5	5	2	3	5	5	2	5	4	5	3	-1.31549	-2.00676
6	6	4	4	7	3	3	7	5	7	7	7	7	5	5	6	4	5	3	7	5	6	6	7	7	7	7	7	7	5	7	7	6	6	7	3	5	7	7	7	3	7	5	6	5	5	4	-0.200463	-1.18866
2	2	4	5	2	2	1	3	3	2	3	2	1	2	2	2	2	2	2	3	2	3	3	5	4	5	3	5	5	3	5	4	3	5	5	2	5	1	1	1	2	1	2	5	2	5	2	-0.842396	-1.98077
4	1	4	1	5	1	1	3	1	1	1	1	1	1	1	1	1	2	2	5	3	3	4	3	2	3	1	1	1	1	1	1	3	2	2	2	2	1	1	3	3	1	2	3	2	2	1	-0.653481	0.399073
5	6	4	5	5	1	1	3	2	2	2	2	2	2	1	1	4	4	6	4	4	4	4	4	4	4	4	4	4	4	5	5	6	2	4	1	1	5	2	7	4	1	5	4	2	5	5	-0.642554	-0.984197
6	1	3	2	3	2	5	3	4	5	3	3	4	6	5	4	5	5	4	6	2	5	4	5	5	5	6	6	4	2	4	4	3	4	4	3	3	4	4	3	4	5	2	4	3	5	1	-0.272696	2.29188
5	3	2	3	2	4	1	1	1	1	1	3	1	1	2	2	1	3	3	1	1	1	7	3	2	2	3	4	2	1	3	4	3	1	3	1	1	1	1	2	4	1	1	5	2	3	1	-0.967022	1.29819
6	3	2	3	5	6	5	6	6	6	5	6	5	4	4	4	3	5	3	6	3	3	4	5	5	5	7	6	6	6	5	6	6	6	6	5	5	6	6	6	6	6	6	6	5	6	6	-0.500148	-0.508112
5	5	5	6	6	4	4	5	5	5	5	6	5	6	5	5	5	5	4	5	5	5	3	6	5	6	6	6	7	4	6	6	6	6	5	5	6	5	4	3	2	5	2	3	2	5	3	-0.708548	-0.58675
3	5	3	5	2	2	2	3	3	3	2	3	4	3	1	1	2	2	2	3	2	1	4	4	4	3	3	3	5	1	2	3	3	2	3	5	2	2	2	3	3	1	2	1	1	2	1	-1.39097	-0.370069
4	5	5	5	5	5	6	5	5	5	6	5	6	5	5	5	6	6	6	6	5	5	2	5	4	6	4	6	6	4	6	5	5	5	6	3	4	5	5	4	3	6	4	6	5	5	4	-0.873312	-1.80209
5	4	5	4	2	5	4	5	5	5	5	6	6	4	4	4	5	4	5	6	6	6	4	4	4	4	4	4	4	4	4	4	6	4	4	4	4	4	4	4	5	5	6	6	4	5	3	0.159057	0.786949
4	5	3	2	3	2	2	4	5	5	7	4	6	2	2	4	7	4	5	7	7	7	2	4	4	5	4	5	7	1	5	5	4	3	2	3	6	5	5	4	4	6	1	1	1	7	2	2.06592	0.588007
7	1	2	1	1	1	5	5	4	7	6	6	7	4	4	4	5	4	3	7	5	7	1	4	3	5	6	7	7	3	7	6	6	7	7	5	7	1	1	1	6	6	1	1	1	7	7	-1.43726	-1.44802
2	1	3	1	2	6	6	6	6	6	6	6	5	4	6	5	6	6	6	7	6	6	2	6	7	6	1	6	7	6	7	5	5	5	5	5	5	4	4	5	5	5	3	7	5	5	1	0.853564	-0.296884
7	7	6	5	7	2	2	5	4	2	1	1	1	1	1	1	4	3	2	3	1	1	6	4	3	2	2	2	3	1	2	2	3	2	3	1	2	1	1	1	1	2	1	2	1	6	1	0.824072	0.306882
7	6	6	5	5	7	3	7	5	7	6	7	7	7	7	7	5	5	5	6	7	5	4	7	7	7	7	7	7	2	7	7	6	6	7	4	5	4	4	6	4	4	2	6	4	7	4	-0.465541	-0.287161
3	5	4	5	3	6	7	6	6	6	6	6	6	4	6	5	7	7	6	6	7	7	6	7	6	6	7	6	7	4	5	7	5	5	5	5	5	4	6	6	5	5	1	6	4	6	4	-1.00911	-0.614422
7	5	6	6	5	7	5	7	2	7	7	7	7	7	7	7	7	7	7	7	7	7	5	5	1	1	1	5	7	1	7	7	4	1	7	7	7	7	7	7	1	7	7	7	7	7	7	-2.72936	1.84742
6	6	6	3	6	7	7	5	6	6	6	6	7	5	6	6	3	2	2	7	5	6	2	6	7	6	6	5	5	2	6	5	6	6	6	2	6	6	6	6	6	6	3	6	5	6	6	-1.60048	-2.81489
6	4	3	3	4	4	3	4	4	5	5	5	5	6	5	5	5	6	4	6	5	4	4	6	4	4	3	3	4	3	4	4	5	5	5	5	5	4	4	4	4	4	4	4	4	5	5	2.19091	1.26073
5	5	4	4	3	6	5	4	5	4	5	3	5	4	3	6	4	3	5	5	4	4	6	5	5	6	5	6	5	5	6	6	4	5	6	5	4	2	3	1	4	3	2	3	4	6	6	-1.77654	-1.11384
3	2	4	6	5	5	3	5	2	5	5	5	5	2	6	6	6	6	5	6	6	6	4	5	5	5	2	3	5	5	4	4	4	2	6	5	5	6	5	7	2	7	5	6	5	6	5	-0.815191	0.0629997
4	4	2	2	4	6	6	4	3	3	2	2	3	3	3	2	3	3	4	4	4	4	3	4	4	4	4	4	5	3	5	5	5	5	5	5	4	4	4	4	4	4	2	5	4	5	3	-2.16905	-0.352546
